# **CRISPR Activation/Inhibition Experiments Reveal that Expression of Intronic MicroRNA *miR-335* Depends on the Promoter Activity of its Host Gene *Mest***

Mathilde Courtes<sup>1</sup>, Céline Lemmers<sup>2</sup>, Anne Le Digarcher<sup>1</sup>, Ilda Coku<sup>1</sup>, Arnaud Monteil<sup>2</sup>, Charles Hong<sup>3,#</sup>, Annie Varrault<sup>1</sup>, and Tristan Bouschet<sup>1,\*</sup>

<sup>1</sup>Institut de Génomique Fonctionnelle, Université de Montpellier, CNRS, INSERM, Montpellier, France

<sup>2</sup>Plateforme de Vectorologie de Montpellier (PVM), BioCampus Montpellier, Université de Montpellier, CNRS, INSERM, Montpellier, France

<sup>3</sup>Vanderbilt University School of Medicine Nashville, Nashville, USA

#Present address: University of Maryland School of Medicine, Baltimore, MD, USA

\*For correspondence: [tristan.bouschet@igf.cnrs.fr](mailto:tristan.bouschet@igf.cnrs.fr)

Keywords: microRNA; CRISPR; CRISPRa; CRISPRi; pluripotent stem cells; mouse; Mest; miR-335.

## ABSTRACT

MicroRNAs are small non-coding RNAs that act as rheostats to modulate gene expression during development, physiology, and disease. Approximately half of mammalian microRNAs are intronic. It is unknown whether intronic miRNA transcription depends on their host gene or a microRNA-specific promoter. Here, we show that CRISPR inhibition of host gene *Mest* downregulated hosted *miR-335* in mouse embryonic stem cells and brain organoids. Reciprocally, CRISPR transactivation of *Mest* upregulated *miR-335*. By contrast, activation of *miR-335* predicted promoter had no effect. Thus, intronic *miR-335* expression depends on the promoter activity of its host gene. This approach could serve to map microRNA promoters.

## INTRODUCTION

1 microRNAs (miRNAs) are short non-coding RNAs that play a central role in regulating gene  
2 expression in plants and animals (Bartel 2018; Jones-Rhoades et al. 2006). miRNAs impact on  
3 development and physiology, and are dysregulated in diseases, including cancer (DeVeale et al. 2021;  
4 Schanen and Li 2011; Xue et al. 2021). Stringent gene annotations suggest that there are ~500  
5 miRNAs in mice (Chiang et al. 2010) and humans (Fromm et al. 2015). It is estimated that  
6 approximately half of mammalian miRNAs are intronic (Meunier et al. 2013; Rodriguez et al. 2004;  
7 Hinske et al. 2014).

8 miRNAs biogenesis sequentially involves transcription, cleavage of the miRNA hairpin precursor  
9 out of the primary transcript, transport of intermediate forms, and loading of the mature miRNA into the  
10 RNA-induced silencing complex (Bartel 2018; Westholm and Lai 2011; Ha and Kim 2014). The  
11 mechanisms that regulate miRNAs transcription, a key factor of miRNA abundance and tissue-specific  
12 expression, are not well defined, in particular for intronic miRNAs. Intronic miRNAs were first observed  
13 as frequently co-regulated with their host genes (Baskerville and Bartel 2005; He et al. 2012; Liang et  
14 al. 2007; Rodriguez et al. 2004; Seitz et al. 2004), suggesting that their transcription depends on the  
15 promoter activity of the host gene. By contrast, recent work suggests that most intronic miRNAs are not  
16 co-regulated with their host genes, which is supported by the fact that they have independent  
17 transcription start sites (Steiman-Shimony et al. 2018). Many additional studies have tried to map  
18 miRNA promoters using bioinformatics tools (Chen et al. 2019). For instance using chromatin  
19 modifications (Ozsolak et al., 2008) or deepCAGE data (Marsico et al., 2013) it was estimated that  
20 ~30% of intronic miRNAs have independent promoters. To our knowledge, whether the transcription of  
21 an intronic miRNA depends on the promoter activity of the host gene or a miR-specific promoter has  
22 not been tested experimentally.

23 *Mest* (Mesoderm-specific transcript) is a protein-coding gene that hosts *miR-335* in one of its  
24 introns. *Mest* and *miR-335* are highly conserved during evolution and frequently co-regulated (Hiramuki

25 et al. 2015; Liang et al. 2007; Ronchetti et al. 2008; Tomé et al. 2011; Yang et al. 2014). This suggests  
26 that *Mest* and *miR-335* are controlled via common regulatory sequences, possibly *Mest* promoter. In  
27 addition, based on a luciferase assay, *miR-335* was proposed to have an independent promoter located  
28 in a *Mest* intron (Zhu et al. 2014).

29 Here, to get insights into the mechanisms of transcription of an intronic miRNA, we have applied  
30 CRISPR/Cas9 -Clustered regularly interspaced short palindromic repeats (CRISPR) and CRISPR-  
31 associated protein 9 (Cas9)- technologies to *Mest* and intronic *miR-335*. More specifically, we have  
32 used CRISPR activation (CRISPRa) and CRISPR inhibition (CRISPRi) where a cleavage defective  
33 Cas9 (dCas9) is fused to either activators or repressors of transcription (Konermann et al. 2015; Yeo et  
34 al. 2018; Gilbert et al. 2013) and directed these complexes to the endogenous promoter sequences of  
35 *Mest* or to the predicted promoter of *miR-335*.

## 36 RESULTS & DISCUSSION

### 37 CRISPRi of host gene *Mest* suppresses the expression of hosted *miR-335* in embryonic stem 38 cells

39 *miR-335* is located in an intron of the protein-coding gene *Mest* (Fig. 1A, B) and is transcribed from the  
40 same DNA strand as its host gene, a common feature of intronic miRNAs (Hinske et al. 2014). *Mest*  
41 has one distal promoter (D) and one proximal promoter (P). *Mest* is highly expressed in mouse  
42 embryonic stem cells (mESCs) and *Mest* transcripts originate predominantly from the proximal  
43 promoter (P) (Fig. 1A, generated from previously published RNA-seq experiments (Bouschet et al.  
44 2017)). Furthermore, *miR-335-3p* was reported to be expressed in mESCs (Kingston and Bartel 2019).

45 We reasoned that if *miR-335* expression depends on the activity of *Mest* promoters, then  
46 repressing transcription at *Mest* promoters in mESCs with CRISPRi should decrease *miR-335*  
47 transcripts. Using Hyper-piggyBac transposase (Yusa et al., 2011), we first generated a CRISPRi  
48 mESC line that stably expressed dCas9 fused to the repressors of transcription KRAB and MeCP2.  
49 dCas9-KRAB-MeCP2 was previously shown to efficiently repress a vast panel of genes in HEK293T

50 cells (Yeo et al. 2018). CRISPRi mESCs (characterized in [Supplemental Fig. S1](#)) were transduced with  
51 lentiviruses that express either a control sgRNA (no match in the mouse genome) or a sgRNA targeting  
52 either the distal or the proximal promoter of *Mest* ([Supplemental Fig. S2A](#)). sgRNAs targeting *Mest*  
53 proximal promoter P downregulated *Mest* while targeting distal promoter D had no obvious effect  
54 ([Supplemental Fig. S2B](#)). Thus, as expected, CRISPRi was efficient only when targeting the active  
55 *Mest* promoter. Levels of the neighboring gene *Copg2* were unaffected ([Supplemental Fig. S2C](#)).

56 We then selected two CRISPRi mESC clones expressing the control sgRNA and two clones  
57 expressing the sgRNA *Mest* P2 for further analyses ([Fig. 1B](#)). There was a >100 fold-downregulation of  
58 *Mest* in CRISPRi *Mest* clones compared to CRISPRi control clones ([Fig. 1C](#)). By contrast, *Copg2*  
59 expression was unaffected ([Fig. 1D](#)). We next measured the levels of miR-335-3p and miR-335-5p, the  
60 final products of miR-335 biogenesis, by gene-specific RT followed by qPCR with Taqman probes. In  
61 CRISPRi *Mest* clones, miR-335-3p and miR-335-5p levels were reduced to less than 1% of levels  
62 measured in CRISPRi control clones ([Fig. 1E, F](#)), a massive downregulation that paralleled well that of  
63 *Mest* ([Fig. 1C](#)). Thus, the transcriptional activity of *Mest* proximal promoter is required for the  
64 expression of intronic *miR-335* in mESCs.

### 65 ***Mest* promoter activity is required for *miR-335* expression in brain organoids**

66 Next, we determined whether *miR-335* expression dependency on *Mest* promoter persists upon  
67 differentiation of mESCs into brain organoids. Brain organoids were generated from mESCs according  
68 to a published protocol (Eiraku et al. 2008) with slight modifications (see *Materials and Methods*). RNA-  
69 seq experiments on these brain organoids show enrichment in Gene Ontology Terms such as ‘forebrain  
70 generation of neurons’ after eight days of differentiation and ‘telencephalon development’ and ‘action  
71 potential’ after 15 days of differentiation (Bouschet and co-workers, unpublished).

72 As expected, brain organoids contained neural progenitors of dorsal identity (NESTIN+PAX6+  
73 cells) after 8 days of differentiation, and neurons (TUBB3+ cells), including some neurons that  
74 expressed the cortical marker TBR1 after 15 days of differentiation ([Fig. 2A](#)).

75 *Mest* and *miR-335* transcripts were upregulated during the generation of brain organoids from  
76 CRISPRi mESCs expressing the control sgRNA (Fig. 2B). By contrast, *Mest* RNA was barely  
77 detectable in CRISPRi organoids expressing the *Mest* sgRNA (Fig. 2B), showing that *Mest* promoter  
78 remains repressed in differentiated cells. Importantly, *miR-335* mature products were also barely  
79 detectable in these organoids (Fig. 2B). Thus, the activity of *Mest* promoter is required for *miR-335*  
80 expression in both undifferentiated mESCs and their neural progeny.

### 81 **CRISPRa on *Mest* increases the expression of hosted *miR-335***

82 We next tested whether transactivating *Mest* promoter is sufficient to increase *miR-335* levels and  
83 therefore mirrors CRISPRi loss of function experiments. mESCs stably expressing the CRISPRa  
84 Synergistic Activation Mediator (SAM) module (Bonev et al. 2017) -composed of three transactivators  
85 (Koner mann et al. 2015)- were transduced with lentiviruses expressing either a control sgRNA or a  
86 sgRNA targeting *Mest* (D) or (P) promoter (Supplemental Fig. S3A) -as described for CRISPRi-.

87 Transactivating *Mest* distal promoter efficiently increased *Mest* transcripts (Supplemental Fig.  
88 S3B). By contrast, transactivating *Mest* proximal promoter with sgRNAs P1 and P2 had no major effect  
89 on *Mest* transcript level (Supplemental Fig. S3B), likely because this promoter is already very active in  
90 ESCs (Fig. 1A). The level of *Copg2* was not altered by any of the three *Mest* sgRNAs (Supplemental  
91 Fig. S3C).

92 We selected for further analysis two CRISPRa control clones and two CRISPRa *Mest* clones  
93 (expressing the D sgRNA, Fig. 3A). On average, there was a 3.2 fold increase in *Mest* transcript in  
94 CRISPRa *Mest* clones compared to clones expressing the control sgRNA (Fig. 3B). As for CRISPRi,  
95 *Copg2* expression was unaffected (Fig. 3C). Strikingly, the levels of both *miR-335-3p* and *miR-335-5p*  
96 also increased by a ~3-fold (Fig. 3D, E). Thus, activating the distal promoter of *Mest* with  
97 CRISPRa/SAM is sufficient to increase hosted *miR-335* levels in mESCs.

98

99 **CRISPRa on *miR-335* putative promoter does not affect *miR-335* levels**

100 A previous study, based on luciferase assays performed in HEK293T cells, suggests that the sequence  
101 upstream of *miR-335* (situated in a *Mest* intron) has some promoter activity (Zhu et al. 2014). Thus, we  
102 next tested whether we could upregulate *miR-335* by directing SAM to this genomic region.

103 Because SAM efficiency correlates with baseline expression levels of the targeted gene – the  
104 fold of upregulation is inversely correlated with basal transcript level- (Konermann et al. 2015), and to  
105 maximize the chance to increase *miR-335*, SAM experiments were performed on cells with lower  
106 baseline levels of *miR-335* than mESCs. We observed that *miR-335*-3p and *miR-335*-5p levels were  
107 respectively 13 and 47 times lower in MEFs compared to mESCs (Fig. 4A, B). *Mest* expression was  
108 also ~60 times less expressed in MEFs than in mESCs (Fig. 4C), adding further support for the  
109 coregulation of *Mest* and *miR-335*.

110 We designed three sgRNAs ( $\mu 1$ ,  $\mu 2$ , and  $\mu 3$ ) in the putative *miR-335* promoter –a region named  
111 pro2 in (Zhu et al. 2014)- and compared their efficiency in upregulating *miR-335* to sgRNAs that target  
112 *Mest* promoters (Fig. 4E). sgRNAs P1 and P2 (which target *Mest* P promoter) strongly upregulated  
113 *Mest* (Fig. 4E) but also *miR-335* mature products in SAM MEFs (Fig. 4G, H). The upregulation of *Mest*  
114 was much higher in MEFs than in mESCs, as expected from their relative *Mest* baseline levels (see  
115 Fig. 4C). By contrast, the three sgRNAs that target the putative promoter of *miR-335* ( $\mu 1$ ,  $\mu 2$ , and  $\mu 3$ )  
116 did not affect *miR-335*-3p nor *miR-335*-5p levels (Fig. 4G, H). Thus, this genomic sequence likely does  
117 not regulate *miR-335* expression in MEFs. We cannot rule out that *miR-335* has an independent  
118 promoter located in another region. In this context, prediction of *miR-335* promoter location using  
119 DeepCAGE data (Marsico et al. 2013) suggests that there could be several *miR-335* promoters  
120 depending on the tissue. According to Marsico and coworkers, the most probable *miR-335* promoters  
121 are *Mest* (D) and (P) promoters - what we confirmed experimentally here-, and less probably, a third  
122 region situated in another intron of *Mest*.

123 Data obtained in MEFs also revealed that transactivating *Mest* (P) promoter resulted in a strong  
124 increase in *Mest* and *miR-335* while transactivating (D) promoter had moderate effects. This contrasts

125 with results obtained in ESCs where the most potent sgRNAs were those targeting the (D) promoter  
126 (Fig. 3 and Supplemental Fig. S3). Taken together, these data suggest that transcriptional activation of  
127 one or the other *Mest* promoter, depending on the cell type, is sufficient to increase the levels of intronic  
128 *miR-335*. This also supports the existence of primary transcripts, originating either at (D) or (P)  
129 promoters, that contain both *Mest* and *miR-335* precursors.

130 To conclude, CRISPRa and CRISPRi experiments on *Mest* and *miR-335* in mouse cells reveal  
131 that transcription of an intronic miRNA is regulated by the promoter of its host gene. Previous works  
132 propose that evolutionarily conserved intronic miRNAs, such as *miR-335*, are more frequently co-  
133 expressed with host genes than recently appeared intronic miRNAs (He et al. 2012; Steiman-Shimony  
134 et al. 2018). This suggests that the transcription of conserved intronic miRNAs depends on the host  
135 promoter while recently appeared intronic miRNAs tend to have independent promoters. To test these  
136 predictions our CRISPRa/i approach could be used to map miRNA promoters on a genome-wide scale.

## 137 MATERIALS AND METHODS

### 138 Cell culture

139 E14Tg2a mouse ESCs and their CRISPRa and CRISPRi derivatives were cultivated on gelatine coated  
140 dishes and maintained pluripotent in Serum/Lif media as described (Varrault et al. 2018). Organoids  
141 were generated in 96-well (U-bottom) Ultra-Low Attachment plates (Sumitomo) by seeding 3000 ESCs  
142 in corticogenesis medium 1: DMEM/F-12/GlutaMAX supplemented with 10% KSR, 0.1 mM of non-  
143 essential amino acids, 1 mM of sodium pyruvate, 50U/ml penicillin/streptomycin, 0.1 mM of 2-  
144 mercaptoethanol (Sigma), 1  $\mu$ M DMH1-HCl (in house synthesized, Vanderbilt University) and 240 nM  
145 IWP-2 (Tocris). On day 8 of differentiation, organoids were transferred to bacterial plates (Greiner) in  
146 corticogenesis medium 2: DMEM/F-12/GlutaMAX supplemented with N2 and B27 (without vitamin A)  
147 supplements, 500  $\mu$ g/ml of BSA, 0.1 mM of non-essential amino acids, 1 mM of sodium pyruvate, 0.1  
148 mM of 2-mercaptoethanol, and 50U/ml penicillin/streptomycin. Immortalized CRISPRa (SAM) MEFs  
149 (gift from Giacomo Cavalli's lab, unpublished) were cultivated in DMEM supplemented with 10% FBS



150 and 50U/ml penicillin/streptomycin. All media components were from Life Technologies unless  
151 otherwise stated. Cell lines were routinely tested for the absence of mycoplasma (Mycoalert, Lonza).

## 152 **Generation of constructs expressing sgRNAs**

153 sgRNA sequences targeting *Mest* promoters were designed using CRISPick  
154 <https://portals.broadinstitute.org/gppx/crispick/public> (formerly GPP sgRNA Design tool) or manually.  
155 sgRNAs that target the putative miR-335 promoter (mm10\_dna range=chr6\_30740830-30741300) were  
156 designed using CHOPCHOP (Labun et al. 2019). Pairs of oligonucleotides (Eurofins) were annealed  
157 and subcloned into either sgRNA(MS2) cloning backbone (Addgene Plasmid #61424) or Lenti  
158 sgRNA(MS2)\_zeo backbone (Konermann et al., 2015) (Addgene plasmid # 61427) that were previously  
159 digested with either BbsI or BsmBI (NEB), respectively, and purified on a Chromaspin column  
160 (Clontech). All constructs were verified by Sanger sequencing (Genewiz). sgRNA sequences are listed  
161 in [Supplemental Table S1](#).

## 162 **Lentiviruses production**

163 Lentiviruses were prepared as described elsewhere (Lin et al. 2002). Briefly, lentiviral transfer vectors  
164 were co-transfected with the HIV packaging plasmid psPAX2 and the plasmid pMD2G (coding for the  
165 vesicular stomatitis virus envelope glycoprotein G), in HEK-293T cells by the calcium phosphate  
166 method. Supernatants were collected at day 2 post-transfection and concentrated on sucrose by  
167 ultracentrifugation at 95 528g for 1.5 h at 4°C.

## 168 **Generation of CRISPRi ESC lines using PiggyBac Transposition**

169 E14Tg2a mouse ESCs were co-transfected with pCMV-HA-HyperpiggyBase (Yusa et al., 2011) and  
170 pB-dCas9-KRAB-MecP2 (Yeo et al. 2018) (Addgene plasmid # 110824) using a Neon transfection  
171 system (Life Technologies). Forty-eight hours post-transfection, cells were selected using Blastidicin  
172 (15 µg/ml, SIGMA). Stable pB-dCas9-KRAB-MeCP2 ESCs (CRISPRi ESCs) were then transduced with  
173 lentiviruses expressing the following sgRNAs: control, *Mest* distal promoter, *Mest* proximal promoter#1,

174 or *Mest* proximal promoter#2. Seventy-two hours post-infection, cells were selected using hygromycin  
175 (1 mg/ml, Life Technologies), and clones were picked and expanded in ESC media.

### 176 **Generation of SAM CRISPRa ESC lines targeting *Mest* promoters**

177 E14Tg2a ESCs stably expressing the SAM system (Bonev et al. 2017) –SAM ESCs- were transfected  
178 with Lenti sgRNA(MS2)\_zeo plasmids expressing the following sgRNAs: control, *Mest* distal promoter,  
179 *Mest* proximal promoter#1, or *Mest* proximal promoter#2. ESCs were selected using Zeocin (250 µg/ml,  
180 Life Technologies) and clones were picked and expanded.

### 181 **Transient transfection of SAM MEFs**

182 80 000 MEFs stably expressing the SAM system (SAM MEFs) were transfected using Lipofectamine  
183 2000 with 300 ng of sgRNA(MS2) plasmid expressing either one control sgRNA, one *Mest* distal  
184 promoter sgRNA (out of 3 different sgRNAs), one *Mest* proximal promoter sgRNA (out of 2 different  
185 sgRNAs), or one *miR-335*-putative promoter sgRNA (out of 3 different sgRNAs). Forty-eight hours later,  
186 RNAs were harvested.

### 187 **RNA extraction and RT-qPCR**

188 Total RNAs were extracted using quick-RNA miniprep kits (Zymo) and quantified on a Nanodrop. RNAs  
189 were retro-transcribed with N6 primers and M-MuLV retro-transcriptase (RT). qPCR was performed  
190 using validated primers and SYBR Green Mix (Roche) in 384-well plates on a LightCycler480 device  
191 (Roche) as described in (Varrault et al. 2018). The level of expression of each gene was normalized to  
192 the average expression levels of three housekeeping genes selected with geNorm (Vandesompele et  
193 al. 2002): *Gapdh*, *Tbp*, and *Mrpl32* for ESCs and *Gapdh*, *Tbp* and *Gusb* for MEFs. qPCR primer  
194 sequences are listed in [Supplemental Table S2](#).

195 miRNAs were retro-transcribed with gene-specific primers and multiscribe RT (Life Technologies). Their  
196 levels of expression were measured with TaqMan probes (miRNA Taqman assays # 000546 for miR-

197 335-5p, and # 002185 for miR-335-3p). and normalized to that of U6 snoRNA (assay # 001973)  
198 (ThermoFisher). We found that U6 was stably expressed across samples (not shown).

### 199 **Visualization of RNA-seq experiment**

200 RNA-seq reads from mESCs -GSE75486 (Bouchet et al. 2017)- were visualized using Integrative  
201 Genomics Viewer (Robinson et al. 2011) -version: 2.8.13-.

### 202 **Immunofluorescence**

203 Immunofluorescence experiments were performed as described (Varrault et al. 2018) using antibodies  
204 directed against (species; provider; catalog number): CAS9 (mouse; Cell signalling; #14697); NANOG  
205 (mouse; BD Pharmingen; #560259); NESTIN (mouse; Santa Cruz; sc-33677); PAX6 (mouse; Covance;  
206 PRB-278P); POU5F1 (rabbit; Cell signalling; #2840); TBR1 (rabbit, Cell signalling; #49661); TUBB3  
207 (mouse; Covance; MMS-435P). Secondary antibodies were anti-mouse or anti-rabbit coupled to Alexa  
208 Fluor® 488 or Cy3 (Jackson ImmunoResearch Laboratories). Nuclei were labeled with DAPI and slides  
209 were mounted with mowiol and observed under a fluorescence microscope (ImagerZ1, Zeiss). Images  
210 of organoids were obtained by tiling and stitching, and insets were taken using the apotome mode.

### 211 **Statistical analysis**

212 Statistical analysis was carried out using GraphPad Prism Version 8 (GraphPad Software, San Diego,  
213 USA). Mann-Whitney test was used for comparing differences between two groups. p values < 0.05  
214 were considered statistically significant.

### 215 **COMPETING INTEREST STATEMENT**

216 The authors declare no competing interests.

### 217 **ACKNOWLEDGMENTS**

218 We thank Laurent Journot for helpful discussions and suggestions; Lauriane Fritsch, Boyan Bonev, and  
219 Giacomo Cavalli for SAM ESCs and SAM MEFs; Hervé Seitz, Adrien Décorsière, and Laure Garnier for

220 critical reading of our draft manuscript; Chris Planque for advice; Philaé Gil and Pierre Nègre for  
221 technical assistance; Lionel Quentin and Nicolas Boucharel for performing mycoplasma tests; members  
222 of the IGF for continuous support. pB-CAGGS-dCas9-KRAB-MeCP2 was a gift from Alejandro Chavez  
223 & George Church (Addgene plasmid # 110824). HyperPiggyBac Transposase (pCMV-HA-HyperpBase)  
224 was a gift of Kosuke Yusa and Allan Bradley and was kindly provided by Thomas Dibling (Sanger,  
225 Cambridge, U.K). sgRNA(MS2) cloning backbone and Lenti sgRNA(MS2)\_zeo backbone were a gift  
226 from Feng Zhang (Addgene plasmids # 61424 and 61427).

## 227 **AUTHOR CONTRIBUTIONS**

228 T.B. conceived the project and designed the study with inputs from A.V.; I.C., M.C., and T.B. performed  
229 cell culture and qPCR experiments; A.L.D. and T.B. generated constructs; A.M. and C.L. generated  
230 lentiviruses; C.H. generated DMH1-HCl; T.B. generated CRISPR cell lines; T.B. performed all of the  
231 analyses and drafted the manuscript; A.V. and T.B. revised the manuscript. All authors read and  
232 approved the final version of the manuscript.

## 233 **REFERENCES**

- 234 Bartel DP. 2018. Metazoan MicroRNAs. *Cell* **173**: 20–51.
- 235 Baskerville S, Bartel DP. 2005. Microarray profiling of microRNAs reveals frequent coexpression with  
236 neighboring miRNAs and host genes. *RNA* **11**: 241–247.
- 237 Bonev B, Mendelson Cohen N, Szabo Q, Fritsch L, Papadopoulos GL, Lubling Y, Xu X, Lv X, Hugnot  
238 JP, Tanay A, et al. 2017. Multiscale 3D Genome Rewiring during Mouse Neural Development.  
239 *Cell* **171**: 557-572 e24.
- 240 Bouschet T, Dubois E, Reynes C, Kota SK, Rialle S, Maupetit-Mehouas S, Pezet M, Le Digarcher A,  
241 Nidelet S, Demolombe V, et al. 2017. In Vitro Corticogenesis from Embryonic Stem Cells  
242 Recapitulates the In Vivo Epigenetic Control of Imprinted Gene Expression. *Cereb Cortex* **27**:  
243 2418–2433.
- 244 Chen L, Heikkinen L, Wang C, Yang Y, Sun H, Wong G. 2019. Trends in the development of miRNA  
245 bioinformatics tools. *Brief Bioinform* **20**: 1836–1852.
- 246 Chiang HR, Schoenfeld LW, Ruby JG, Auyeung VC, Spies N, Baek D, Johnston WK, Russ C, Luo S,  
247 Babiarz JE, et al. 2010. Mammalian microRNAs: experimental evaluation of novel and  
248 previously annotated genes. *Genes Dev* **24**: 992–1009.

- 249 DeVeale B, Swindlehurst-Chan J, Billeloch R. 2021. The roles of microRNAs in mouse development.  
250 *Nat Rev Genet* **22**: 307–323.
- 251 Eiraku M, Watanabe K, Matsuo-Takasaki M, Kawada M, Yonemura S, Matsumura M, Wataya T,  
252 Nishiyama A, Muguruma K, Sasai Y. 2008. Self-organized formation of polarized cortical tissues  
253 from ESCs and its active manipulation by extrinsic signals. *Cell Stem Cell* **3**: 519–32.
- 254 Fromm B, Billipp T, Peck LE, Johansen M, Tarver JE, King BL, Newcomb JM, Sempere LF, Flatmark K,  
255 Hovig E, et al. 2015. A Uniform System for the Annotation of Vertebrate microRNA Genes and  
256 the Evolution of the Human microRNAome. *Annu Rev Genet* **49**: 213–242.
- 257 Gilbert LA, Larson MH, Morsut L, Liu Z, Brar GA, Torres SE, Stern-Ginossar N, Brandman O,  
258 Whitehead EH, Doudna JA, et al. 2013. CRISPR-Mediated Modular RNA-Guided Regulation of  
259 Transcription in Eukaryotes. *Cell* **154**: 442–451.
- 260 Ha M, Kim VN. 2014. Regulation of microRNA biogenesis. *Nat Rev Mol Cell Biol* **15**: 509–524.
- 261 He C, Li Z, Chen P, Huang H, Hurst LD, Chen J. 2012. Young intragenic miRNAs are less coexpressed  
262 with host genes than old ones: implications of miRNA-host gene coevolution. *Nucleic Acids Res*  
263 **40**: 4002–4012.
- 264 Hinske LC, França GS, Torres HAM, Ohara DT, Lopes-Ramos CM, Heyn J, Reis LFL, Ohno-Machado  
265 L, Kreth S, Galante PAF. 2014. miRIAD—integrating microRNA inter- and intragenic data.  
266 *Database* **2014**. <https://doi.org/10.1093/database/bau099> (Accessed September 2, 2021).
- 267 Hiramuki Y, Sato T, Furuta Y, Surani MA, Sehara-Fujisawa A. 2015. Mest but Not MiR-335 Affects  
268 Skeletal Muscle Growth and Regeneration. *PLOS ONE* **10**: e0130436.
- 269 Jones-Rhoades MW, Bartel DP, Bartel B. 2006. MicroRNAs AND THEIR REGULATORY ROLES IN  
270 PLANTS. *Annu Rev Plant Biol* **57**: 19–53.
- 271 Kingston ER, Bartel DP. 2019. Global analyses of the dynamics of mammalian microRNA metabolism.  
272 *Genome Res* **29**: 1777–1790.
- 273 Konermann S, Brigham MD, Trevino AE, Joung J, Abudayyeh OO, Barcena C, Hsu PD, Habib N,  
274 Gootenberg JS, Nishimasu H, et al. 2015. Genome-scale transcriptional activation by an  
275 engineered CRISPR-Cas9 complex. *Nature* **517**: 583–8.
- 276 Labun K, Montague TG, Krause M, Torres Cleuren YN, Tjeldnes H, Valen E. 2019. CHOPCHOP v3:  
277 expanding the CRISPR web toolbox beyond genome editing. *Nucleic Acids Res* **47**: W171–  
278 W174.
- 279 Liang Y, Ridzon D, Wong L, Chen C. 2007. Characterization of microRNA expression profiles in normal  
280 human tissues. *BMC Genomics* **8**: 1–20.
- 281 Lin Y-L, Mettling C, Portales P, Reynes J, Clot J, Corbeau P. 2002. Cell surface CCR5 density  
282 determines the postentry efficiency of R5 HIV-1 infection. *Proc Natl Acad Sci* **99**: 15590.
- 283 Marsico A, Huska MR, Lasserre J, Hu H, Vucicevic D, Musahl A, Orom UA, Vingron M. 2013.  
284 PROMiRNA: a new miRNA promoter recognition method uncovers the complex regulation of  
285 intronic miRNAs. *Genome Biol* **14**: 1–23.

- 286 Meunier J, Lemoine F, Soumillon M, Liechti A, Weier M, Guschanski K, Hu H, Khaitovich P,  
287 Kaessmann H. 2013. Birth and expression evolution of mammalian microRNA genes. *Genome*  
288 *Res* **23**: 34–45.
- 289 Robinson JT, Thorvaldsdóttir H, Winckler W, Guttman M, Lander ES, Getz G, Mesirov JP. 2011.  
290 Integrative genomics viewer. *Nat Biotechnol* **29**: 24–26.
- 291 Rodriguez A, Griffiths-Jones S, Ashurst JL, Bradley A. 2004. Identification of Mammalian microRNA  
292 Host Genes and Transcription Units. *Genome Res* **14**: 1902–1910.
- 293 Ronchetti D, Lionetti M, Mosca L, Agnelli L, Andronache A, Fabris S, Deliliers GL, Neri A. 2008. An  
294 integrative genomic approach reveals coordinated expression of intronic miR-335, miR-342, and  
295 miR-561 with deregulated host genes in multiple myeloma. *BMC Med Genomics* **1**: 37.
- 296 Schanen BC, Li X. 2011. Transcriptional regulation of mammalian miRNA genes. *Genomics* **97**: 1–6.
- 297 Seitz H, Royo H, Bortolin M-L, Lin S-P, Ferguson-Smith AC, Cavallé J. 2004. A Large Imprinted  
298 microRNA Gene Cluster at the Mouse Dlk1-Gtl2 Domain. *Genome Res* **14**: 1741–1748.
- 299 Steiman-Shimony A, Shtrikman O, Margalit H. 2018. Assessing the functional association of intronic  
300 miRNAs with their host genes. *RNA* **24**: 991–1004.
- 301 Tomé M, López-Romero P, Albo C, Sepúlveda JC, Fernández-Gutiérrez B, Dopazo A, Bernad A,  
302 González MA. 2011. miR-335 orchestrates cell proliferation, migration and differentiation in  
303 human mesenchymal stem cells. *Cell Death Differ* **18**: 985–995.
- 304 Vandesompele J, De Preter K, Pattyn F, Poppe B, Van Roy N, De Paepe A, Speleman F. 2002.  
305 Accurate normalization of real-time quantitative RT-PCR data by geometric averaging of  
306 multiple internal control genes. *Genome Biol* **3**: RESEARCH0034.
- 307 Varrault A, Eckardt S, Girard B, Le Digarcher A, Sassetti I, Meusnier C, Ripoll C, Badalyan A, Bertaso  
308 F, McLaughlin KJ, et al. 2018. Mouse Parthenogenetic Embryonic Stem Cells with Biparental-  
309 Like Expression of Imprinted Genes Generate Cortical-Like Neurons That Integrate into the  
310 Injured Adult Cerebral Cortex. *Stem Cells* **36**: 192–205.
- 311 Westholm JO, Lai EC. 2011. Mirtrons: microRNA biogenesis via splicing. *Biochimie* **93**: 1897–1904.
- 312 Xue B, Chuang C-H, Prosser HM, Fuziwara CS, Chan C, Sahasrabudhe N, Kühn M, Wu Y, Chen J,  
313 Biton A, et al. 2021. miR-200 deficiency promotes lung cancer metastasis by activating Notch  
314 signaling in cancer-associated fibroblasts. *Genes Dev* **35**: 1109–1122.
- 315 Yang D, Lutter D, Burtscher I, Uetzmann L, Theis FJ, Lickert H. 2014. miR-335 promotes  
316 mesendodermal lineage segregation and shapes a transcription factor gradient in the  
317 endoderm. *Development* **141**: 514–525.
- 318 Yeo NC, Chavez A, Lance-Byrne A, Chan Y, Menn D, Milanova D, Kuo C-C, Guo X, Sharma S, Tung  
319 A, et al. 2018. An enhanced CRISPR repressor for targeted mammalian gene regulation. *Nat*  
320 *Methods* **15**: 611–616.

321 Zhu L, Chen L, Shi C-M, Xu G-F, Xu L-L, Zhu L-L, Guo X-R, Ni Y, Cui Y, Ji C. 2014. MiR-335, an  
322 Adipogenesis-Related MicroRNA, is Involved in Adipose Tissue Inflammation. *Cell Biochem*  
323 *Biophys* **68**: 283–290.

324

## 325 **FIGURE LEGENDS**

326 **Figure 1.** CRISPRi on *Mest* suppresses the expression of hosted *miR-335* in embryonic stem cells

327 (A) Transcription originates from the proximal promoter of *Mest* (P) in mouse embryonic stem cells.

328 Integrative Genomics Viewer tracks showing coverage plot and alignment of RNA-seq reads for mouse  
329 embryonic stem cells. Reads for *Mest* (blue) are transcribed from the plus strand, while reads from  
330 *Copg2* (pink) are transcribed from the minus strand. Chromosomal coordinates and gene annotation  
331 are from the RefSeq mm9 build. D: *Mest* distal promoter; P: *Mest* proximal promoter.

332 (B) Schematic of mouse *Mest* gene with the CRISPRi module (dCas9-KRAB-MeCP2) targeting the  
333 proximal promoter P of *Mest*.

334 (C, D) Repression of *Mest* promoter downregulates *Mest* (C) but does not affect the expression of  
335 neighboring *Copg2* (D). RNAs were quantified in two CRISPRi ESC clones expressing the control  
336 sgRNA (grey) and two CRISPRi ESC clones expressing *Mest* sgRNA (red). Data are mean  $\pm$  sem of  
337 five independent experiments and expressed as fold change over control clone #1. \*\*:p<0.01 (Mann-  
338 Whitney test).

339 (E, F) Influence of repressing *Mest* promoter on miR-335-3p and miR-335-5p levels. Data are mean  $\pm$   
340 sem of five independent experiments and expressed as fold change over control clone #1. \*\*:p<0.01  
341 (Mann-Whitney test).

342 **Figure 2.** *miR-335* expression depends on *Mest* promoter activity in brain organoids

343 (A) Immunofluorescence staining on brain organoids derived from mESCs using antibodies for brain  
344 primordium markers NESTIN/PAX6 (middle panels) and TUBB3/TBR1 (right panels) after eight and 15

345 days of differentiation. The top panels show entire organoids. The bottom panels are zoom-in insets of  
346 an area in organoids. Scale bars: 200  $\mu\text{m}$  for organoids (top panels) and 50  $\mu\text{m}$  for insets (bottom  
347 panels).

348 (B) Time course of expression of *Mest* and *miR-335* mature products during the development of brain  
349 organoids from CRISPRi ESCs stably expressing either control sgRNA or *Mest* sgRNA. Heatmap  
350 shows the mean of four independent experiments performed on two CRISPRa sgRNA control and two  
351 CRISPRa sgRNA ESC clones. Heatmap was built using Morpheus.

352 <https://software.broadinstitute.org/morpheus/>

353 **Figure 3.** CRISPRa on *Mest* increases the expression of hosted *miR-335* in embryonic stem cells

354 (A) Schematic of mouse *Mest* gene structure with the CRISPRa SAM - synergistic activation mediator-  
355 module targeting the distal promoter D of *Mest*.

356 (B, C) Transactivation of *Mest* promoter upregulates *Mest* (B) but does not affect neighboring *Copg2*  
357 expression (C). Data are mean  $\pm$  sem of five independent experiments performed on two CRISPRa  
358 sgRNA control (grey) and two CRISPRa sgRNA *Mest* clones (green) and expressed as fold change  
359 over control clone#1. \*\*:p<0.01 (Mann-Whitney test).

360 (D; E) Transactivation of *Mest* promoter increases miR-335-3p (D) and miR-335-5p (E) levels. Data are  
361 mean  $\pm$  sem of four independent experiments and expressed as fold change over control clone#1.  
362 \*:p<0.05 (Mann-Whitney test).

363 **Figure 4.** CRISPRa on *miR-335* putative promoter does not affect *miR-335* levels in MEFs

364 (A-C) Endogenous expression of *miR-335* products and *Mest* is weaker in SAM MEFs than in SAM  
365 ESCs. Data are mean  $\pm$  sem of qPCR experiments performed on five MEF and five ESC samples and  
366 normalized to the average value obtained on ESCs. \*\*:p<0.01 (Mann-Whitney test).



367 (D) Structure of mouse *Mest* gene with SAM targeting either the distal promoter of *Mest* D (D1-D2  
368 sgRNAs), the proximal promoter of *Mest* P (P1-P3 sgRNAs), or the putative promoter of *miR-335* ( $\mu$ 1-  
369  $\mu$ 3 sgRNAs).

370 (E-H) Levels of expression of *Mest* (E), *Copg2* (F), *miR-335-3p* (G), and *miR-335-5p* (H) were  
371 measured after transactivation of either *Mest* D or P promoters or *miR-335* putative promoter. SAM  
372 MEFs were transfected with plasmids expressing sgRNAs targeting *Mest* D (sgRNAs D1, D2, and D3),  
373 *Mest* P (P1 and P2), or the putative promoter of *miR-335* ( $\mu$ 1,  $\mu$ 2, and  $\mu$ 3). Data are mean  $\pm$  sem of  
374 three to four independent experiments and expressed as fold change over sgRNA control taken as 1. \*:  
375  $p < 0.05$  in Mann-Whitney test (comparison with sgRNA control values). None of the sgRNAs that direct  
376 the CRISPRa/SAM machinery towards the *miR-335* putative promoter ( $\mu$ 1,  $\mu$ 2, and  $\mu$ 3) altered *miR-*  
377 *335* levels.

## 378 SUPPLEMENTAL FIGURE LEGENDS

379 **Supplemental Figure S1.** Characterization of the dCas9-KRAB-MeCP2 (CRISPRi) ESC line

380 (A) Expression of CAS9 in parental E14Tga2 ESCs and their CRISPRi derivatives. Scale bars: 50  $\mu$ m.

381 (B) Expression of pluripotency factors POU5F1 (green) and NANOG (red) in parental E14Tga2 ESCs  
382 and their CRISPRi derivatives. Scale bars: 20  $\mu$ m.

383 **Supplemental Figure S2.** Efficient CRISPRi of *Mest* when targeting its proximal promoter

384 (A) Structure of mouse *Mest* gene with the CRISPRi module (dCa9-KRAB-MeCP2) directed to either  
385 the distal (D) (sgRNA D, green) or proximal (P) (sgRNAs P1 -purple- and P2 -red-) promoter of *Mest*.  
386 The sgRNA control (grey) has no match in the mouse genome.

387 (B, C) Repression of *Mest* proximal promoter downregulates *Mest* expression (B) and does not affect  
388 neighboring *Copg2* expression (C). CRISPRi ESCs were transduced with lentiviruses expressing either  
389 sgRNA control, sgRNA D, sgRNA P1, or sgRNA P2. RNAs were measured by RT-qPCR. Data are

390 mean  $\pm$  sem of seven independent experiments and expressed as fold change over control sgRNA. \*:  
391  $p < 0.05$ , \*\*\*:  $p < 0.001$  in Mann-Whitney test (comparison with sgRNA control values). Only the sgRNAs  
392 targeting the proximal promoter repressed *Mest*.

393 **Supplemental Figure S3.** Efficient CRISPRa of *Mest* when targeting its distal promoter

394 (A) Structure of mouse *Mest* gene with the CRISPRa tool SAM targeting either the distal (sgRNA D,  
395 green) or the proximal (sgRNAs P1 -purple- and P2 -red-) promoter of *Mest*. The sgRNA control (grey)  
396 has no match in the mouse genome.

397 (B, C) Transactivation of *Mest* distal promoter upregulates *Mest* expression (B) and does not affect  
398 neighboring *Copg2* expression (C). CRISPRa SAM ESCs were transduced with lentivirus expressing  
399 either SgRNA control, D, P1, or P2. *Mest* (B) and *Copg2* (C) were measured by RT-qPCR. Data are  
400 mean  $\pm$  sem of four independent experiments. \*:  $p < 0.1$  in Mann-Whitney test. Only the sgRNA targeting  
401 the distal promoter upregulated *Mest* RNA.

402 **Supplemental Table S1.** Sequences of sgRNAs

403 **Supplemental Table S2.** Primers used for qPCR assays

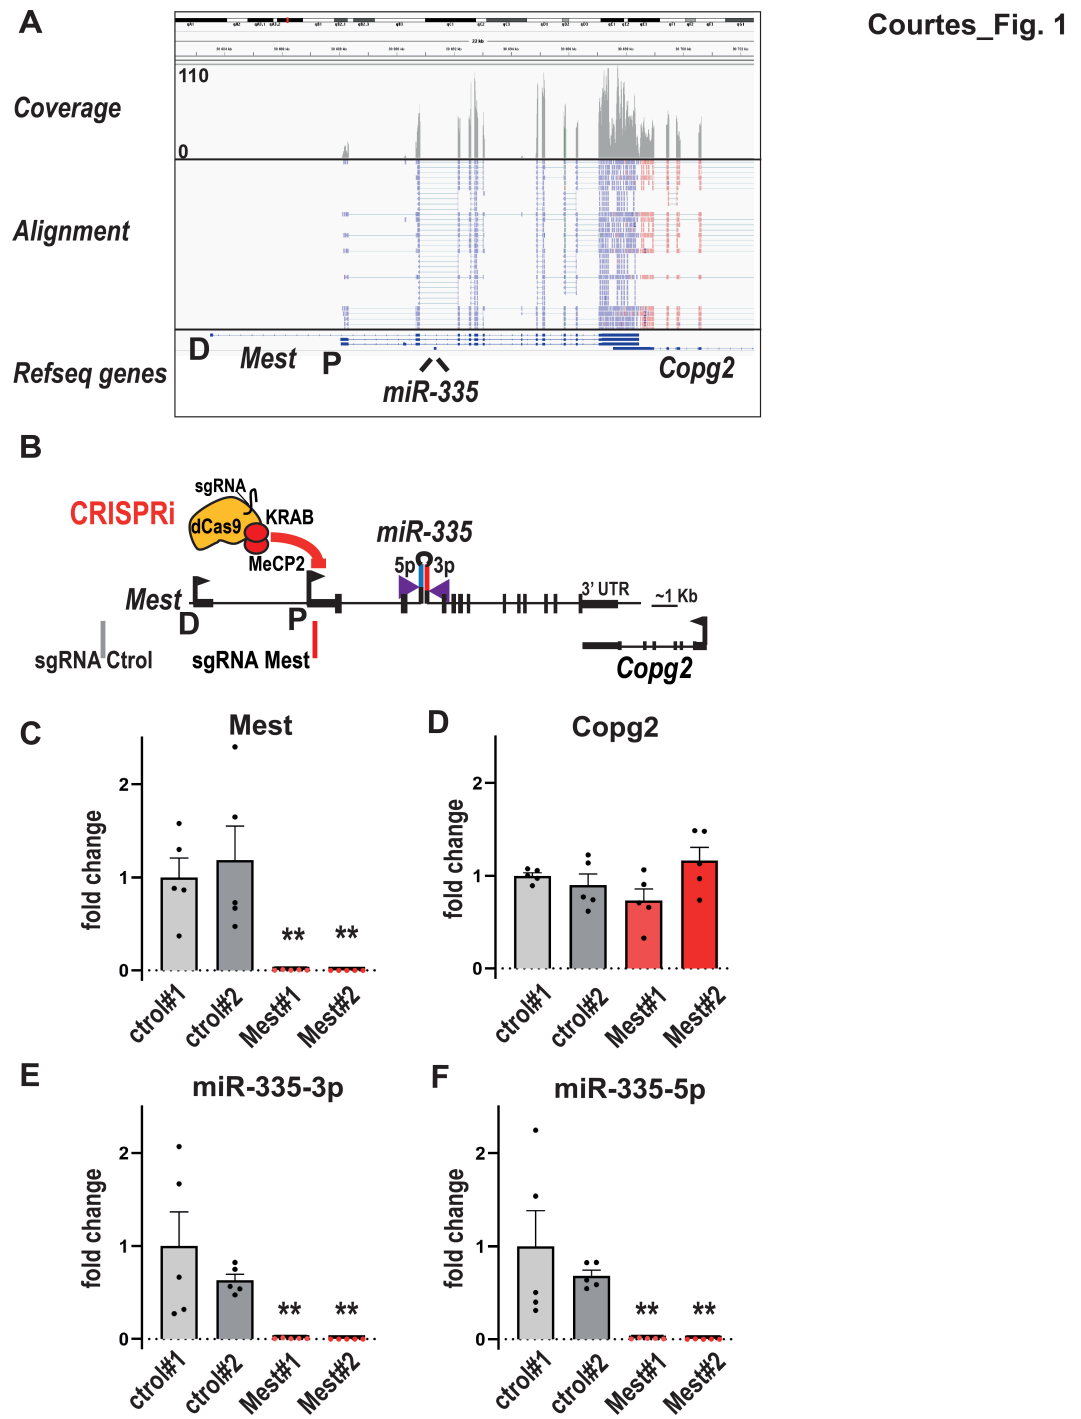

**Figure 1.** CRISPRi on *Mest* suppresses the expression of hosted *miR-335* in embryonic stem cells

(A) Transcription originates from the proximal promoter of *Mest* (P) in mouse embryonic stem cells. Integrative Genomics Viewer tracks showing coverage plot and alignment of RNA-seq reads for mouse embryonic stem cells. Reads for *Mest* (blue) are transcribed from the plus strand, while reads from *Copg2* (pink) are transcribed from the minus strand. Chromosomal coordinates and gene annotation are from the RefSeq mm9 build. D: *Mest* distal promoter; P: *Mest* proximal promoter.

(B) Schematic of mouse *Mest* gene with the CRISPRi module (dCas9-KRAB-MeCP2) targeting the proximal promoter of *Mest*.

(C, D) Repression of *Mest* promoter downregulates *Mest* (C) but does not affect the expression of neighboring *Copg2* (D). RNAs were quantified in two CRISPRi ESC clones expressing the control sgRNA (grey) and two CRISPRi ESC clones expressing the *Mest* sgRNA (red). Data are mean  $\pm$  sem of five independent experiments and expressed as fold change over control clone #1. \*\*:p<0.01 (Mann-Whitney test).

(E, F) Influence of repressing *Mest* promoter activity on *miR-335-3p* and *miR-335-5p* levels. Data are mean  $\pm$  sem of five independent experiments and expressed as fold change over control clone #1. \*\*:p<0.01 (Mann-Whitney test).

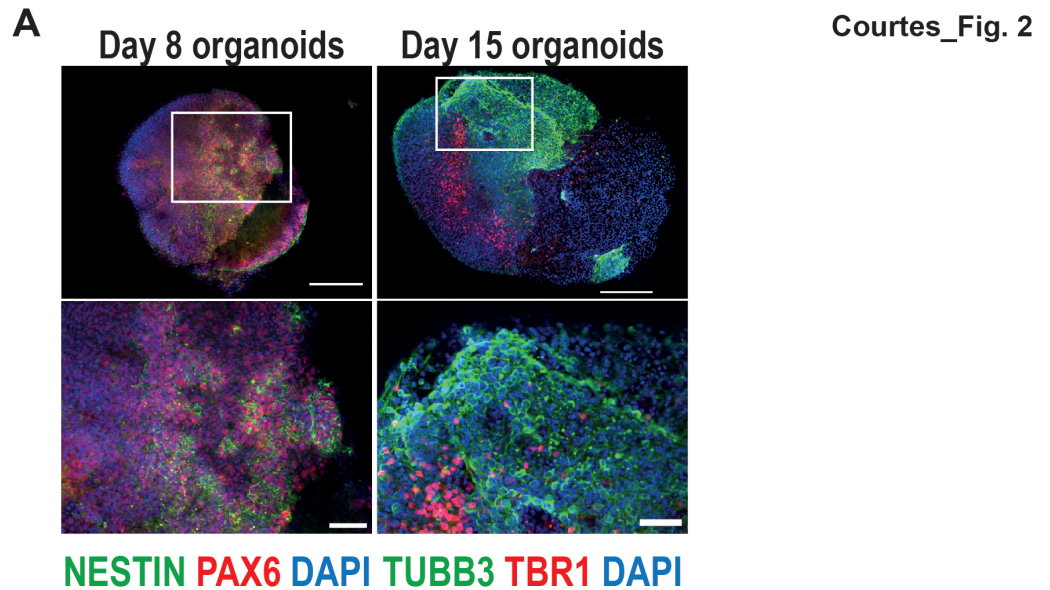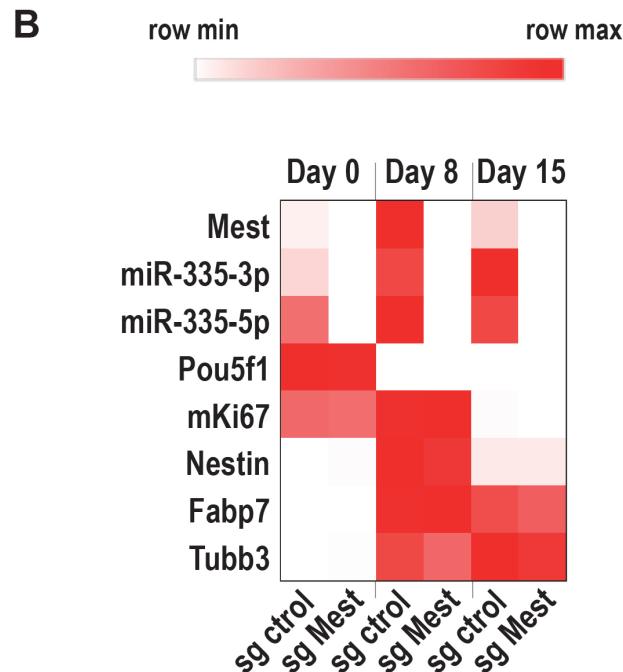

**Figure 2.** *miR-335* expression depends on *Mest* promoter activity in brain organoids

(A) Immunofluorescence staining on brain organoids derived from mESCs using antibodies for brain primordium markers NESTIN/PAX6 (middle panels) and TUBB3/TBR1 (right panels) after eight and 15 days of differentiation. The top panels show entire organoids. The bottom panels are zoom-in insets of an area in organoids. Scale bars: 200  $\mu$ m for organoids (top panels) and 50  $\mu$ m for insets (bottom panels).

(B) Time course of expression of *Mest* and *miR-335* mature products during brain organogenesis from CRISPRi ESCs stably expressing either control sgRNA or *Mest* sgRNA. Heatmap shows the mean of four independent experiments performed on two CRISPRa sgRNA control and two CRISPRa sgRNA ESC clones. Heatmap was built using Morpheus. <https://software.broadinstitute.org/morpheus/>

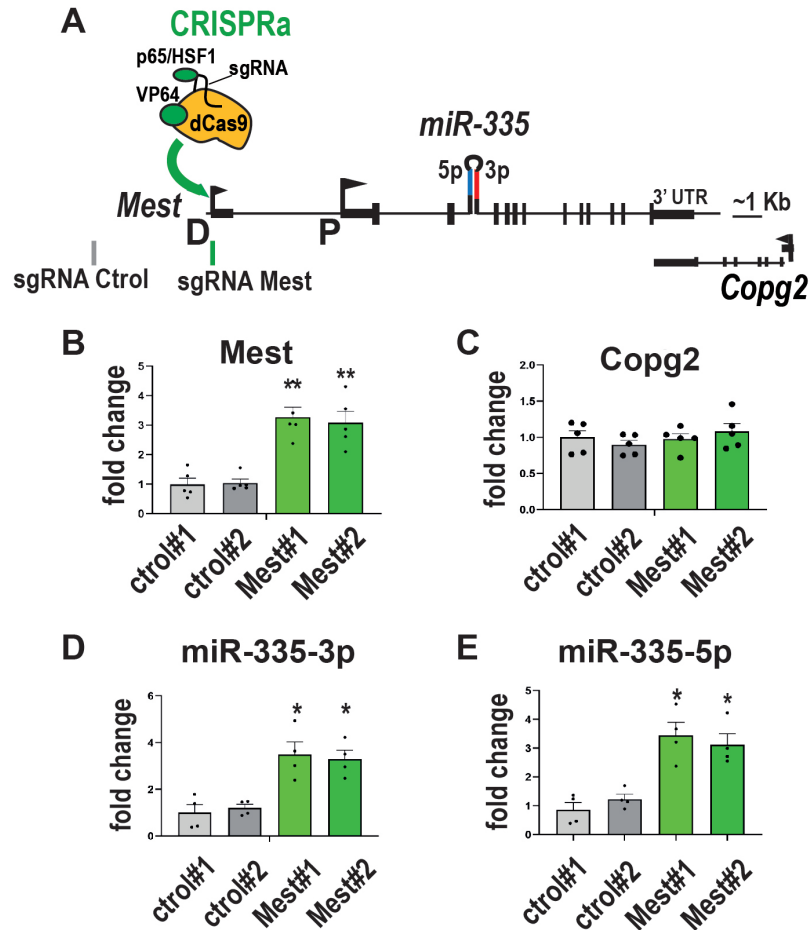

**Figure 3.** CRISPRa on *Mest* increases the expression of hosted *miR-335* in embryonic stem cells

(A) Schematic of mouse *Mest* gene structure with the CRISPRa SAM - synergistic activation mediator- module targeting the distal promoter D of *Mest*.

(B, C) Transactivation of *Mest* promoter upregulates *Mest* (B) but does not affect neighboring *Copg2* expression (C). Data are mean  $\pm$  sem of five independent experiments performed on two CRISPRa sgRNA control (grey) and two CRISPRa sgRNA *Mest* clones (green) and expressed as fold change over control clone#1. \*\*:p<0.01 (Mann-Whitney test).

(D; E) Transactivation of *Mest* promoter increases *miR-335-3p* (D) and *miR-335-5p* (E) levels. Data are mean  $\pm$  sem of four independent experiments and expressed as fold change over control clone#1. \*:p<0.05 (Mann-Whitney test).

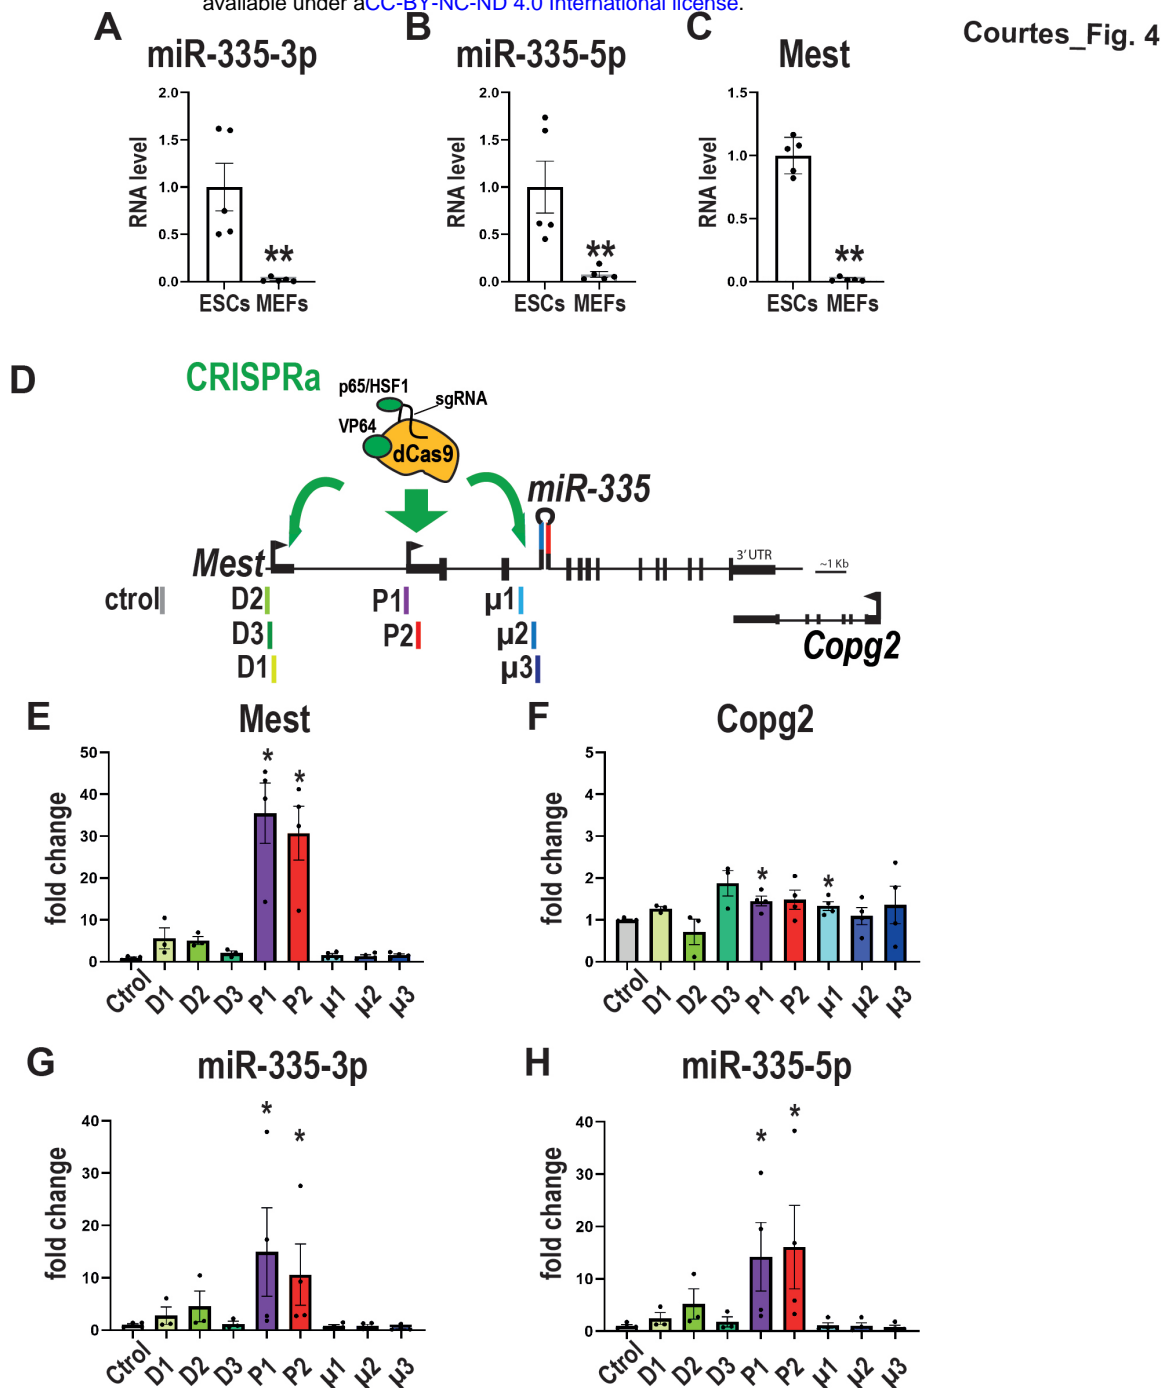

**Figure 4.** CRISPRa on *miR-335* putative promoter does not affect *miR-335* levels in MEFs

(A-C) Endogenous expression of *miR-335* products and *Mest* is weaker in SAM MEFs than in SAM ESCs. Data are mean  $\pm$  sem of qPCR experiments performed on five MEF and five ESC samples and normalized to the average value obtained on ESCs. \*\*:p<0.01 (Mann-Whitney test).

(D) Structure of mouse *Mest* gene with SAM targeting either the distal promoter of *Mest* D (D1-D2 sgRNAs), the proximal promoter of *Mest* P (P1-P3 sgRNAs), or the putative promoter of *miR-335* ( $\mu$ 1- $\mu$ 3 sgRNAs).

(E-H) Levels of expression of *Mest* (E), *Copg2* (F), *miR-335-3p* (G), and *miR-335-5p* (H) were measured after transactivation of either *Mest* D or P promoters or *miR-335* putative promoter. SAM MEFs were transfected with plasmids expressing sgRNAs targeting *Mest* D (sgRNAs D1, D2, and D3), *Mest* P (P1 and P2), or the putative promoter of *miR-335* ( $\mu$ 1,  $\mu$ 2, and  $\mu$ 3). Data are mean  $\pm$  sem of three to four independent experiments and expressed as fold change over sgRNA control taken as 1. \*: p<0.05 in Mann-Whitney test (comparison with sgRNA control values). Note that none of the sgRNAs that direct the CRISPRa/SAM machinery towards the *miR-335* putative promoter ( $\mu$ 1,  $\mu$ 2, and  $\mu$ 3) altered *miR-335* levels.

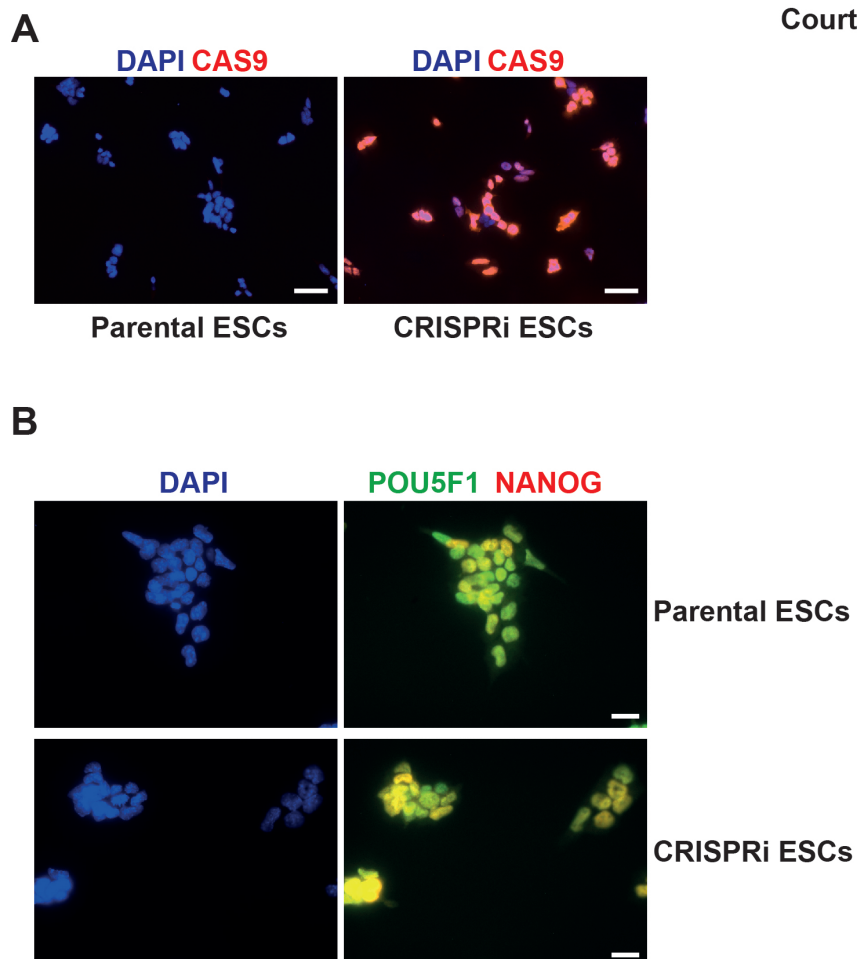

**Supplemental Figure S1.** Characterization of the dCas9-KRAB-MeCP2 (CRISPRi) ESC line

(A) Expression of CAS9 in parental E14Tga2 ESCs and their CRISPRi derivatives. Scale bars: 50  $\mu$ m.

(B) Expression of pluripotency factors POU5F1 (green) and NANOG (red) in parental E14Tga2 ESCs and their CRISPRi derivatives. Scale bars: 20  $\mu$ m.

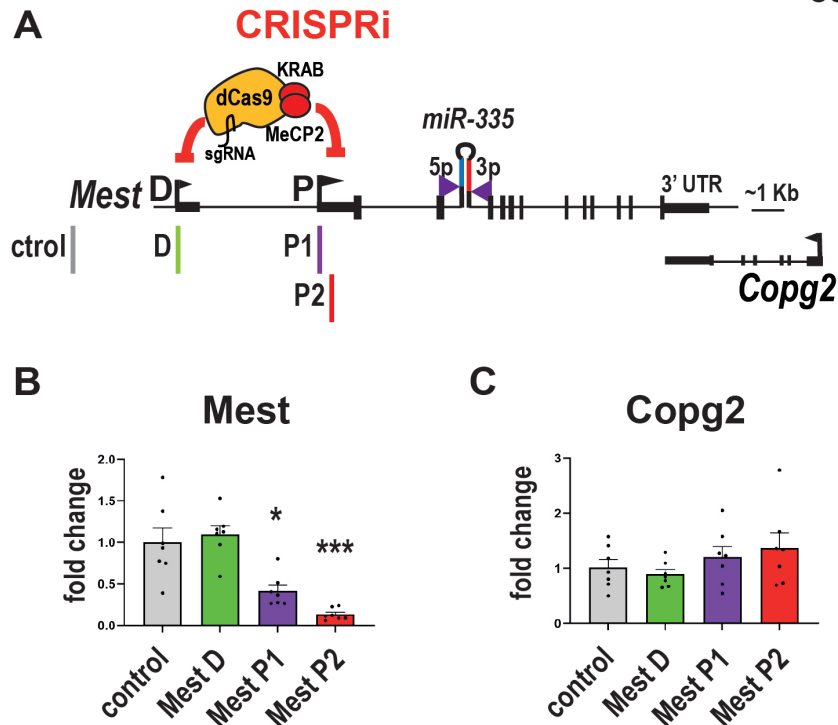

**Supplemental Figure S2.** Efficient CRISPRi of *Mest* when targeting its proximal promoter

(A) Structure of mouse *Mest* gene with the CRISPRi module (dCas9-KRAB-MeCP2) directed to either the distal (*D*) (sgRNA D, green) or proximal (*P*) (sgRNAs P1 -purple- and P2 -red-) promoter of *Mest*. The sgRNA control (grey) has no match in the mouse genome.

(B, C) Repression of *Mest* proximal promoter downregulates *Mest* expression (B) and does not affect neighboring *Copg2* expression (C). CRISPRi ESCs were transduced with lentiviruses expressing either sgRNA control, sgRNA D, sgRNA P1, or sgRNA P2. RNAs were measured by RT-qPCR. Data are mean  $\pm$  sem of seven independent experiments and expressed as fold change over control sgRNA. \*:  $p < 0.05$ , \*\*\*:  $p < 0.001$  in Mann-Whitney test (comparison with sgRNA control values). Only the sgRNAs targeting the proximal promoter repressed *Mest*.



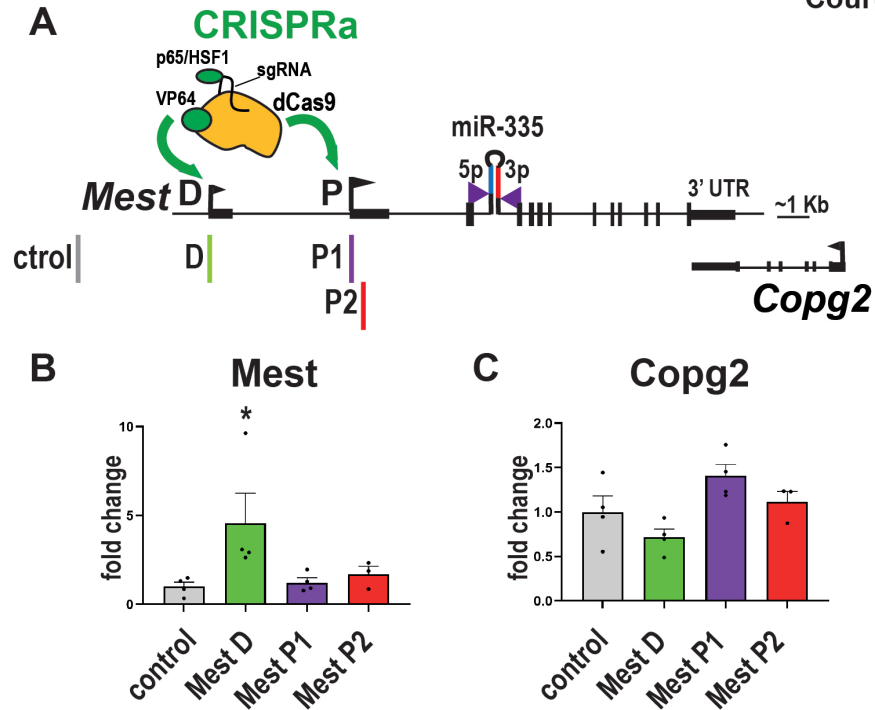

**Supplemental Figure S3.** Efficient CRISPRa of *Mest* when targeting its distal promoter

(A) Structure of mouse *Mest* gene with the CRISPRa tool SAM targeting either the distal (sgRNA D, green) or the proximal (sgRNAs P1 -purple- and P2 -red-) promoter of *Mest*. The sgRNA control (grey) has no match in the mouse genome.

(B, C) Transactivation of *Mest* distal promoter upregulates *Mest* expression (B) and does not affect neighboring *Copg2* expression (C). CRISPRa SAM ESCs were transduced with lentivirus expressing either SgRNA control, D, P1, or P2. *Mest* (B) and *Copg2* (C) were measured by RT-qPCR. Data are mean  $\pm$  sem of four independent experiments. \*:  $p < 0.1$  in Mann-Whitney test. Only the sgRNA targeting the distal promoter upregulated *Mest* RNA.

| <b>sgRNA</b>             | <b>sequence 5' to 3'</b> |
|--------------------------|--------------------------|
| Control (Addgene #61424) | GGGTCTTCGAGAAGACCTGT     |
| Control (Addgene #61427) | GGAGACGGGATACCGTCTCT     |
| Mest p1                  | GCTCAGTGGGCTTTAAAAGT     |
| Mest p2                  | GGCGCAGCAGCTTTCCTCTG     |
| Mest d1                  | GAGGGCCCAGCGGGGCGGCG     |
| Mest d2                  | AACCAGGGGAAGGACAGCTG     |
| Mest d3                  | CAACCCAAATCACCTGCCCC     |
| miR-335 $\mu$ 1          | TTTTGAGCGCCCCTAGTGTC     |
| miR-335 $\mu$ 2          | TTACAACAGCATTGGAGAT      |
| miR-335 $\mu$ 3          | GAAGAAACCGAGAAACAGAT     |

**Supplemental Table S1.** Sequence of sgRNAs

| Symbol        | Gene ID | Forward Seq.                  | Reverse Seq.                     |
|---------------|---------|-------------------------------|----------------------------------|
| <i>Mest</i>   | 17294   | CAACAATGACGGCAACCTGGT         | TCTGAATTTCTTCCTTTGATTAATGTACTGTA |
| <i>Copg2</i>  | 54160   | TGATGTGGTTAAACGATGGATAAATGAAG | TGGAGACAGCAAGCCGATCAT            |
| <i>Tubb3</i>  | 22152   | CCAGTGCGGCAACCAGATAGG         | AAAGGCGCCAGACCGAACACT            |
| <i>Nanog</i>  | 71950   | GCCTCTCCTCGCCCTTCCTCT         | CCACCGCTTGCACTTCATCCTT           |
| <i>Pou5f1</i> | 18999   | CTGTAGGGAGGGCTTCGGGCACTT      | CTGAGGGCCAGGCAGGAGCAGAG          |
| <i>Fabp7</i>  | 12140   | TCCAGCTGGGAGAAGAGTTT          | CCAACCGAACCCACAGACTTA            |
| <i>Nes</i>    | 18008   | CGGAGAGGGAGCAGCACCAA          | GGCCTCCCCACAGCATCCT              |
| <i>Gapdh</i>  | 14433   | GGAGCGAGACCCCACTAACA          | ACATACTCAGCACCGGCCTC             |
| <i>Gusb</i>   | 110006  | GATTCAGATATCCGAGGAAAGG        | GCCAACGGAGCAGGTTGA               |
| <i>Mki67</i>  | 17345   | TCCAGACTTCCACAGAGAC           | TTCACCTTCATCCAGATTCAC            |
| <i>Mrpl32</i> | 75398   | AGGTGCTGGGAGCTGCTACA          | AAAGCGACTCCAGCTCTGCT             |
| <i>Tbp</i>    | 21374   | ACTTCGTGCAAGAAATGCTGAAT       | CAGTTGTCCGTGGCTCTCTTATT          |

**Supplemental Table S2.** Primers used for qPCR assays
